# Supplementary material
Source: PubMed Central journal article supplement (PMC8822471)
Supplement: NIHMS1733365-supplement-1.pdf [file NIHMS1733365-supplement-1.pdf]

| Supplement 1. Complete Codebook     |                              |                                                                                       |                                                                                                         |
|-------------------------------------|------------------------------|---------------------------------------------------------------------------------------|---------------------------------------------------------------------------------------------------------|
| Domain                              | Sub-domain                   | Code                                                                                  | Definition                                                                                              |
| Patient communication and resources | Pre-operative counseling     | Face-to-face education                                                                | Educational information provided in-person to the patient before surgery                                |
|                                     |                              | Expectation setting                                                                   | Preparation of the patient and/or their family for the surgical episode of care                         |
|                                     |                              | Patient activation                                                                    | Extent to which the patient is engaged with their own care and management before surgery                |
|                                     |                              | Education materials                                                                   | Written or electronic educational materials and resources provided to the patient before surgery        |
|                                     | Discharge counseling         | Face-to-face education                                                                | Educational information provided in-person to the patient after surgery                                 |
|                                     |                              | Expectation setting                                                                   | Preparation of the patient and/or their family for recovery after discharge                             |
|                                     |                              | Patient activation                                                                    | Extent to which the patient is engaged with their own care and management after surgery                 |
|                                     |                              | Discharge planning                                                                    | Processes in place to transition care from inpatient to the post-discharge setting                      |
|                                     |                              | Discharge materials                                                                   | Written or electronic educational materials and resources provided to the patient before discharge      |
|                                     | Patient support system       | Caregiver help/engagement                                                             | Extent to which the patient's caregiver(s) are engaged with the patient's care and management           |
|                                     |                              | Caregiver burden                                                                      | The physical, emotional, professional and financial stress on the patient's caregivers                  |
|                                     |                              | Post-operative home support                                                           | Healthcare supplies and resources provided after discharge                                              |
|                                     |                              | Social support/interaction                                                            | Social interaction and support available to the patient                                                 |
|                                     | Post-discharge communication | Phone call                                                                            | Communication between patients and clinicians by telephone                                              |
|                                     |                              | Telemedicine                                                                          | Communication between patients and clinicians by video call                                             |
|                                     |                              | Health application                                                                    | Communication between patients and clinicians by computer or smartphone application                     |
|                                     |                              | Pictures                                                                              | Sharing of clinical photographs between patients and clinicians                                         |
|                                     |                              | Email                                                                                 | Communication between patients and clinicians by e-mail                                                 |
|                                     |                              | MyChart messaging                                                                     | Communication between patients and clinicians by MyChart (Epic® electronic medical record based system) |
|                                     |                              | Follow-up protocol                                                                    | Defined post-discharge patient monitoring and follow-up protocol                                        |
| Patient activation                  |                              | Patient engagement and participation in their own care                                |                                                                                                         |
| In person visit                     |                              | In-person clinic encounter for care after discharge                                   |                                                                                                         |
| Reponse burden                      |                              | Time and effort patients are willing to dedicate to completion of follow-up materials |                                                                                                         |
| Patient experiences                 | -                            | Symptom trends                                                                        | Changes over time in patient signs and symptoms                                                         |
|                                     |                              | Symptom timing                                                                        | The time at which the patient experiences a symptom                                                     |
|                                     | Subjective symptoms          | Anxiety                                                                               | Feelings of anxiety or fear                                                                             |
|                                     |                              | Depression                                                                            | Feelings of depression or sadness                                                                       |
|                                     |                              | Cognitive function                                                                    | Changes in a patient's mental acuity noticed by the patient or another individual                       |
|                                     |                              | Fatigue                                                                               | Reduced energy, feelings of sleepiness or exhaustion                                                    |
|                                     |                              | Pain                                                                                  | Physical pain                                                                                           |
|                                     |                              | Physical function                                                                     | Limitations in physical function or ability to complete activities of daily living                      |
|                                     |                              | Shortness of breath                                                                   | Feeling short of breath or difficulty catching breath                                                   |
|                                     |                              | Sleep disturbance                                                                     | Difficulty falling or staying asleep, oversleeping                                                      |
|                                     |                              | Sexual dysfunction                                                                    | Changes in libido or ability to engage in or enjoy sexual activity                                      |
|                                     |                              | Bowel issues                                                                          | Constipation, diarrhea, or problems with ostomy management                                              |
|                                     |                              | Urinary complaint                                                                     | Pain with urination, difficulty urinating, or incontinence                                              |

|                       |                                                                        |                                                                                        |                                                                                                               |
|-----------------------|------------------------------------------------------------------------|----------------------------------------------------------------------------------------|---------------------------------------------------------------------------------------------------------------|
|                       |                                                                        | Nausea/vomiting                                                                        | Feelings of nausea, vomiting, or retching                                                                     |
|                       |                                                                        | Gas/bloating                                                                           | Feelings of gastrointestinal bloating, increased belching or flatus                                           |
|                       |                                                                        | Appetite and hydration                                                                 | Changes in a patient's appetite, ability to stay hydrated, or the taste of foods                              |
|                       |                                                                        | Reflux                                                                                 | Heartburn or other symptoms of gastrointestinal reflux                                                        |
|                       |                                                                        | Medication issues                                                                      | Difficulty obtaining or taking medications, side effects, of ineffectiveness                                  |
|                       |                                                                        | Lightheadedness                                                                        | Lightheadedness, dizziness, or fainting                                                                       |
|                       |                                                                        | Fever/chills                                                                           | Subjective sensation of fever or chills                                                                       |
|                       | Objective signs                                                        | Temperature                                                                            | Measurement of temperature with a thermometer                                                                 |
|                       |                                                                        | Blood pressure                                                                         | Measurement of blood pressure                                                                                 |
|                       |                                                                        | Respiratory rate                                                                       | Measurement of respiratory rate                                                                               |
|                       |                                                                        | Wound problem                                                                          | Drainage, opening, redness, or other complications related to a surgical wound                                |
|                       |                                                                        | Steps/pedometer                                                                        | Measurement of step count after patient discharge                                                             |
|                       |                                                                        | Weight change                                                                          | Measurement or change in body weight                                                                          |
|                       |                                                                        | Bleeding                                                                               | Bleeding, including bleeding from surgical sites and gastrointestinal tract                                   |
|                       |                                                                        | Heart rate                                                                             | Measurement of heart rate or pulse                                                                            |
|                       | Medical devices                                                        | Extremity swelling                                                                     | Swelling of arms or legs                                                                                      |
|                       |                                                                        | Surgical drains                                                                        | Maintenance of surgical drains                                                                                |
|                       |                                                                        | Ostomy appliance                                                                       | Maintenance of ostomy appliance and bag                                                                       |
|                       |                                                                        | Foley catheter                                                                         | Maintenance of indwelling urinary catheter                                                                    |
| Feeding tube          |                                                                        | Maintenance of enteric feeding device                                                  |                                                                                                               |
| Health system factors | Patient factors                                                        | Patient access                                                                         | The ability of patient to be seen and evaluated by a clinician after discharge from the hospital              |
|                       |                                                                        | Financial burden                                                                       | Financial burden of surgery-related supplies and care                                                         |
|                       |                                                                        | General resource burden                                                                | Non-financial burden of surgery-related care                                                                  |
|                       |                                                                        | Technology/tech literacy                                                               | Ability of patients, and their caregivers, to use and understand health technology                            |
|                       |                                                                        | Discharge process                                                                      | Discharge process from the hospital, including nursing protocols                                              |
|                       |                                                                        | Communication                                                                          | Communication between clinicians, patients, and caregivers                                                    |
|                       | Clinician factors                                                      | Staffing model                                                                         | Organization of clinical staff including nurses, APPs, MA's, schedulers and their respective responsibilities |
|                       |                                                                        | Real-time data management                                                              | Availability and utility of monitoring patient data in real-time.                                             |
|                       |                                                                        | Scheduling                                                                             | Process of scheduling patients for follow-up appointments                                                     |
|                       |                                                                        | Established protocols/procedures                                                       | Standard protocols and clinical pathways for patient management before or after surgery                       |
|                       |                                                                        | Task sharing/personnel                                                                 | Division of responsibility for tasks related to patient monitoring and follow-up among clinicians             |
|                       |                                                                        | System efficiency                                                                      | Efficiency of current perioperative care and communication systems                                            |
|                       |                                                                        | Staff education                                                                        | Education and training of clinical staff                                                                      |
|                       |                                                                        | Knowledge of staff                                                                     | Clinical knowledge and expertise of clinicians                                                                |
|                       | Time management                                                        | Approaches to and challenges with time management among clinicians                     |                                                                                                               |
|                       | Access to diagnostic tools                                             | Access to diagnostic laboratory or imaging tests after discharge                       |                                                                                                               |
|                       | Process customization                                                  | Tailoring follow-up practices to individual patient or clinician needs and preferences |                                                                                                               |
|                       | Data trends                                                            | Trends in patient data                                                                 |                                                                                                               |
| Workaround            | Methods employed by clinicians to overcome or bypass systemic barriers |                                                                                        |                                                                                                               |

|       |  |             |                                                                   |
|-------|--|-------------|-------------------------------------------------------------------|
| Other |  | Barrier     | Barrier to post-discharge care, communication, or monitoring      |
|       |  | Facilitator | Facilitator for post-discharge care, communication, or monitoring |

429

430

431 **Supplement 2. Clinician Interview Protocol**

432

433 Introduction and informed consent

434

435 Questions

436 1. We would like to better understand your experience managing patients after they are  
437 discharged from the hospital following GI cancer surgery.

438 a. How do you know how patients are doing during this period of time? Do you have a  
439 standard routine or practice?

440 b. What are some of the things you think we are doing well in identifying problems that  
441 arise?

442 c. What are some of the biggest barriers you see in identifying problems that arise?

443 2. Based on your personal experience with GI cancer surgery patients and their recovery after  
444 leaving the hospital, what are the clinical problems or issues you hear about and/or  
445 manage?

446 a. How do you currently approach managing problems that patients are experiencing  
447 while at home?

448 b. Are there any early warning signs, buzz words and/or triggers which make you  
449 particularly concerned? What about among patients with complications?

450 c. What are the number of days after discharge do you typically hear from patients? Are  
451 there any patterns with respect to certain problems and number of days after  
452 discharge?

453 d. Do you feel some of these issues could be identified earlier, or prevented?

454 3. Please see this list of patient reported outcomes. Assuming we can adequately / accurately  
455 measure these symptoms, can you please indicate the PROs you feel would be important to  
456 monitor in GI surgery patients? Why?

- 457 a. What is missing from this list, please also consider rare complications and  
458 bothersome symptoms.
- 459 b. Is there additional information you would find helpful to know (e.g., heart rate,  
460 temperature).
- 461 4. [IF TIME ASK] Although we will focus more extensively on this in future work, we would like  
462 to know your initial thoughts on a system to more proactively monitor patients while at home
- 463 a. Is this something you feel would be beneficial to you and your patients?
- 464 b. Do you have ideas about how we could best monitor patients during this high risk  
465 time period?
- 466 c. What barriers or concerns do you have about using PROs in this setting?
- 467 d. What other items, in addition to PROs, do you feel is important to include to monitor  
468 patients?

469

470 Conclusion:

471 Is there anything else that you would like to tell us about, or make sure that we learn about while  
472 we are here today?

473

474 Thanks for agreeing to take time to meet with us today.

475

476 **Supplement 3. Patient Interview Protocol**

477

478 Introduction and informed consent

479

480 Post-operative, Post-discharge Recovery Review

481 We will ask questions to better understand the patients experience recovering from surgery

482 while recovering at home:

- 483 • Did you receive any information from your health care team about your recovery at home
- 484 and what to expect?
- 485 ○ Before surgery?
- 486 ○ At discharge?
- 487 • What concerns about your recovery at home did you have when you were being discharged
- 488 from the hospital?
- 489 ○ Did you feel you were ready for discharge?
- 490 ○ What went well during the discharge process?
- 491 ○ What could have been done differently during the discharge process?
- 492 ○ \*\*What concerned you the most about your recover at home?
- 493 • We would like to discuss any bothersome symptoms, problems, and/or potential
- 494 complications you experienced while at home
- 495 ○ Did you experience symptoms that concerned you while at home?
- 496 ○ What other problems / issues were concerns of yours?
- 497 ○ Did you experience a complication? How was it managed?
- 498 ○ \*\*What were the first symptoms you experienced before the complication? Were
- 499 there any early warning signs (sentinel symptoms) you experienced?

- 500 • As mentioned, we are designing a tool to help the health care team monitor patients after  
501 discharge from the hospital while recovering at home. Concerning findings would lead to an  
502 intervention by your health care team, potentially decreasing the severity of the issue, or  
503 preventing a major complication. A special questionnaire that asks questions about your  
504 symptoms would be sent to you and tracked over time, kind of like how vital signs and labs  
505 were measured during your hospital stay. Changes would indicate to your care team a  
506 problem might exist.
- 507 ○ Show list of symptoms
    - 508 ■ Did you experience any of these symptoms? Please describe what bothered  
509 you, even a little bit.
  - 510 ○ Would it be helpful to you if we were able to remotely monitor these symptoms?
  - 511 ○ What other symptoms would be helpful to monitor?
  - 512 ○ Would you be willing to report your daily temperature or heart rate for example?
  - 513 ○ Would you be interested in other forms of communication such as sending pictures,  
514 doing video calls?
- 515 • We would like to ask you about communication with your health care team
- 516 ○ Did you know how to contact your health care team to communicate your concerns?  
517 How did you know?
  - 518 ○ Did you contact your health care team while at home? Tell us what your experience  
519 was like.
  - 520 ○ Was there a delay in communication?
  - 521 ○ \*\*How do you/would you prefer to communicate with your health care team?
    - 522 ■ Phone, email, MyChart/MyNM, text message, video call
  - 523 ○ \*\*How often would you prefer to be in contact with your health care team?
    - 524 ■ Daily, every couple days, weekly, as needed
- 525

526 Conclusion

527

528

529 Is there anything else that you would like to tell us about, or make sure that we learn about while  
530 we are here today?

531

532 Thanks for agreeing to take time to meet with us today.

533

534

535
